# Supplementary material for: 1,2,3-Trimethoxypropane: a bio-sourced glyme as electrolyte for lithium–O2 batteries
Source: Royal Society of Chemistry journal article supplement (doi:10.1039/d2gc01567f), 2022-01-01
Supplement: d2gc01567f1.pdf [file d2gc01567f1.pdf]

# Supporting Information

## 1,2,3 – Trimethoxypropane: a bio-sourced glyme as electrolyte for Lithium-O<sub>2</sub> batteries

Marta Alvarez-Tirado,<sup>a</sup> Laurent Castro,<sup>\*b</sup> Shuai Qian,<sup>c</sup> Jason E. Bara,<sup>c</sup> Marco Di Gennaro,<sup>d</sup> Konstantinos Gkagkas,<sup>b</sup> Aurélie Guéguen,<sup>b</sup> and David Mecerreyes<sup>\* a,e</sup>

<sup>a</sup> POLYMAT University of the Basque Country UPV/EHU, Avenida Tolosa 72, Donostia-San Sebastian 2008, Spain

<sup>b</sup> Material Engineering Division, Toyota Motor Europe NV/SA, Technical Center, 1930 Zaventem, Belgium

<sup>c</sup> Department of Chemical & Biological Engineering, University of Alabama, Box 870203, Tuscaloosa, Alabama 35487-0203, United States

<sup>d</sup> Nanomat, Q-Mat, CESAM, European Theoretical Spectroscopy Facility, Universite de Liege, B-4000 Liege, Belgium

<sup>e</sup> Ikerbasque, Basque Foundation for Science, E-48011, Bilbao, Spain

### AUTHOR INFORMATION

\*e-mail: david.mecerreyes@ehu.es, Laurent.Castro@toyota-europe.com

## EXPERIMENTAL DETAILS

### Synthesis of 1,2,3-Trimethoxypropane (TMP)<sup>1</sup>

To a 250 mL pressure vessel loaded with NaOH (40.0 g, 1.0 mol) and dimethyl sulfoxide (80 mL) was added 1,3-dimethoxypropane-2-ol (60.1 g, 0.5 mol). The mixture was stirred at RT for 30 min, followed by a singular addition of methyl iodide (142.0 g, 2 equiv.). The temperature was raised to 50 °C and the reaction was allowed to run for 6 h before cooling down to RT. Solids were filtered and washed with 50 mL Et<sub>2</sub>O. The liquid mixture was dissolved into 500 mL Et<sub>2</sub>O, washed in sequence with 2×60 mL DI water and 3×80 mL saturated NaHCO<sub>3</sub> solution, and dried over anhydrous MgSO<sub>4</sub>. The solids were then filtered and solvent was removed by rotary evaporation under reduced pressure. The remaining liquid was distilled to afford 34.7 g (51.7%) 1,2,3-TMP. <sup>1</sup>H NMR (360 MHz, DMSO-*d*<sub>6</sub>) δ 3.46 – 3.34 (m, 5H), 3.33 (s, 3H), 3.24 (d, *J* = 2.4 Hz, 6H). <sup>1</sup>H NMR data (Fig. S7) agreed well with that in literature<sup>1</sup>.

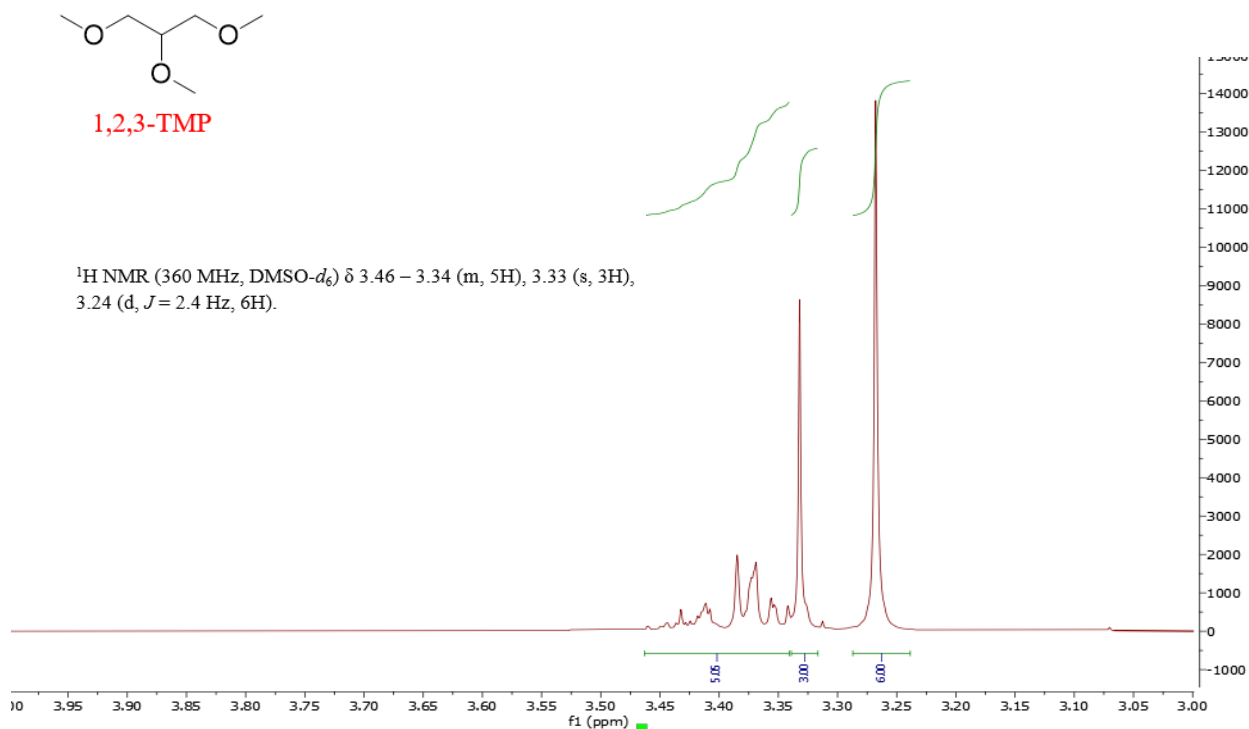

Fig. S1. <sup>1</sup>H NMR spectra of 1,2,3-TMP.

## Simulation Details

All-atom Molecular Dynamics (MD) simulations were performed on two systems: LiTFSI salt diluted in diglyme solvent (Liquid-G2) and 1,2,3 – TMP solvent (Liquid-TMP). The CLANDP force field<sup>2–6</sup> was used. The ratio between the number of solvent molecules and the number of salt molecules was fixed to 7 in order to respect the experimental value. The number of anions was fixed to 50, for a total of 400 molecules in the simulation box. Periodic boundary conditions were used.

The initial configuration of the box was realized with PACKMOL<sup>6</sup>, while the MD simulation were performed within the GROMACS simulation package version 2021.2<sup>7–13</sup>.

The system composed by solvent and anion was then neutralized. An energy minimization was performed with a 50k steps and a tolerance of  $10 \text{ kJ mol}^{-1} \text{ nm}^{-1}$ , followed by a canonical NVT equilibration of 2 ns (1M steps of 2fs each). Coordinates were saved each 100 steps. The coulomb and van der Waals cutoff for intermolecular interactions were set to 1.0 nm each. Long-range electrostatic interactions were treated by means of the Particle-mesh Ewald method with cubic (i.e. 4<sup>th</sup> order polynomial) interpolation method and 0.16 spacing in the Fourier space. A leap-frog integrator (md) was employed to integrate Newton's equations, with a Verlet cutoff-scheme within an update of the neighbor list each 10 steps for neighbor search. H-bonds were constrained with the LINCS algorithm (we used the default values of 1 iteration number and 4 for the order in the expansion of the constraint coupling matrix). The temperature bath is controlled through an independent thermostat for each residue (DIG/TMP, TFS and LI), with a temperature coupling using velocity rescaling with a stochastic term<sup>14</sup> and a temperature reference of 1 K.

A further isothermal-isobaric NPT equilibration was performed for another 2 ns (1M steps of 2 fs), reading the velocities from the previous step. A Berendsen barostat was imposed, with a reference pressure of 1atm and an isotropic pressure coupling of 1 bar and time constant of 1 ps. To insure statistical independence, a second NPT equilibration run was performed with 10 ns (10M steps of 1 fs) and similar barostat/thermostat characteristics. Water compressibility of  $4.5 \times 10^{-5} \text{ bar}^{-1}$  was used.

Finally, five independent MD production runs were initiated reading velocities from this last run, and the results here presented are averaged on top of them.

## Electrolyte components properties

**Table S1** Key properties of most common ether based molecules, including 1,2,3 - TMP.

| Solvent                 | Empirical formula                              | bp (°C) | mp (°C) | Flash point (°C) | Autoignition temperature (°C) | Density, 25 °C (g/cm <sup>3</sup> ) | Dielectric constant <sup>15</sup> , 25 °C | Safety pictograms and danger health hazards*                                                                                                                                                       |
|-------------------------|------------------------------------------------|---------|---------|------------------|-------------------------------|-------------------------------------|-------------------------------------------|----------------------------------------------------------------------------------------------------------------------------------------------------------------------------------------------------|
| Monoglyme (DME, G1)     | C <sub>4</sub> H <sub>10</sub> O <sub>2</sub>  | 85      | -141    | -2               | 202                           | 0.867                               | 6.99                                      | <br>H315 – Skin irritation.<br>H332 – Harmful if inhaled.<br>H360FD - May damage fertility or the unborn child. |
| Diglyme (G2)            | C <sub>6</sub> H <sub>14</sub> O <sub>3</sub>  | 162     | -64     | 57               | 188                           | 0.944                               | 7.23                                      | <br>H360FD - May damage fertility or the unborn child.                                                          |
| Triglyme (G3)           | C <sub>8</sub> H <sub>18</sub> O <sub>4</sub>  | 216     | -45     | 111              | 190                           | 0.986                               | 7.51                                      | <br>H319 – Serious eye irritation.<br>H360Df - May damage the unborn child. Suspected of damaging fertility.   |
| Tetraglyme (TEGDME, G4) | C <sub>10</sub> H <sub>22</sub> O <sub>5</sub> | 275     | -30     | 141              | 265                           | 1.009                               | 7.68                                      |                                                                                                               |

| Solvent                 | Empirical formula                             | bp (°C) | mp (°C) | Flash point (°C) | Autoignition temperature (°C) | Density, 25 °C (g/cm3) | Dielectric constant <sup>15</sup> , 25 °C | Safety pictograms and danger health hazards*                                                                                                                                                                                                                                                                                                                  |
|-------------------------|-----------------------------------------------|---------|---------|------------------|-------------------------------|------------------------|-------------------------------------------|---------------------------------------------------------------------------------------------------------------------------------------------------------------------------------------------------------------------------------------------------------------------------------------------------------------------------------------------------------------|
|                         |                                               |         |         |                  |                               |                        |                                           | H319 – Serious eye irritation.<br>H360Df - May damage fertility or the unborn child.                                                                                                                                                                                                                                                                          |
| 1,2,3 TMP               | C <sub>6</sub> H <sub>14</sub> O <sub>3</sub> | 148     | -       | 45.5***          | Unknown                       | 0.942                  | Unknown                                   | ***According to OECD guidelines and source:<br><ul style="list-style-type: none"> <li>✓ Low acute toxicity</li> <li>✓ No skin sensitization</li> <li>✓ No mutagenicity</li> <li>✓ No ecotoxicity in aquatic environment</li> </ul> <ul style="list-style-type: none"> <li>▪ It is eye irritant.</li> </ul> <p>Major hazards have not been determined yet.</p> |
| 1,3 – Dioxolane (DOL)   | C <sub>3</sub> H <sub>6</sub> O <sub>2</sub>  | 76      | -95     | -3               | 274                           | 1.06                   | 7.13                                      | <br>H319 – Serious eye irritation.<br>H360Df - May damage the unborn child. Suspected of damaging fertility.                                                                                                                                                              |
| 1,3,5, - Trioxane (TRI) | C <sub>3</sub> H <sub>6</sub> O <sub>3</sub>  | 114     | 64      | 45               | 410                           | 1.38                   | 15.55 **                                  |                                                                                                                                                                                                                                                                          |

| Solvent           | Empirical formula                             | bp (°C) | mp (°C) | Flash point (°C) | Autoignition temperature (°C) | Density, 25 °C (g/cm <sup>3</sup> ) | Dielectric constant <sup>15</sup> , 25 °C | Safety pictograms and danger health hazards*                                                            |
|-------------------|-----------------------------------------------|---------|---------|------------------|-------------------------------|-------------------------------------|-------------------------------------------|---------------------------------------------------------------------------------------------------------|
|                   |                                               |         |         |                  |                               |                                     |                                           | H335 – May cause respiratory irritation.<br>H361 – Suspected of damaging fertility or the unborn child. |
| Paraldehyde (PAR) | C <sub>6</sub> H <sub>12</sub> O <sub>3</sub> | 124     | 12      | 36               | 238                           | 0.99                                | 14.7                                      |                      |

\*Data taken from source: Merck/Sigma-Aldrich safety data sheets. Only included health hazard codes in the text. Pictograms and associated hazards codes:

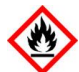

**GHS02** – Flammable gases, aerosols, liquids or solids. Self-reactive substances and mixtures, pyrophoric liquids or solids, self-heating substances and mixtures, substances and mixtures that in contact with water emit flammable gases; or organic peroxides

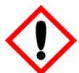

**GHS07** – Acute toxicity, skin irritation, eye irritation, skin sensitization or specific target organ toxicity.

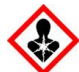

**GHS08** – Health hazard such as respiratory sensitization, germ cell mutagenicity, carcinogenicity, reproductive toxicity or specific target organ toxicity.

\*\*At 65 °C

\*\*\*Data taken from source: M. Sutter *et al.*, *Green Chemistry*, 2013, **11**, 3020-3026, DOI : 10.1039/c3gc41082j

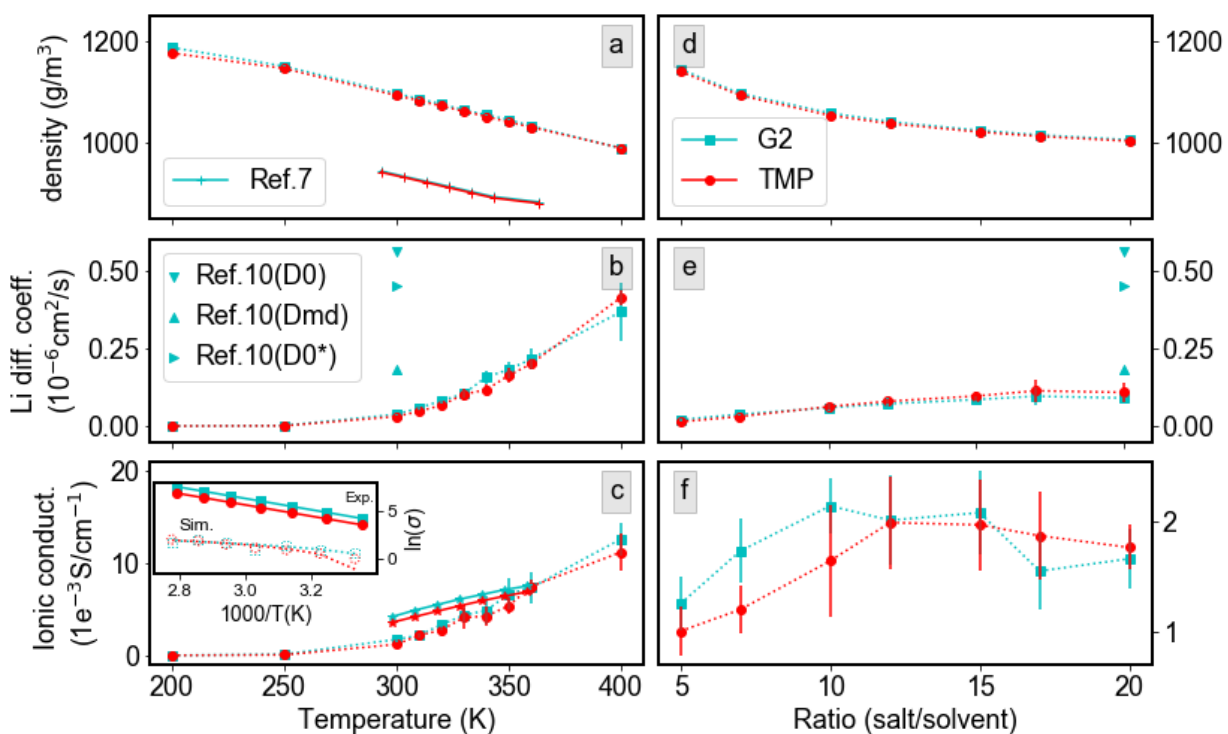

**Fig. S2.** Simulation results of Density (top panels, *a and d*), Lithium diffusion coefficient (middle panel, *b and e*) and Lithium ionic conductivity (bottom panel, *c and f*); for increasing temperature (left column) and salt/solvent ratio (right column). Results are shown for diglyme-based electrolyte (*light blue*) and TMP-based electrolytes (*red*). Values from literature correspond as follows: Ref.7 (Flowers et. al)<sup>1</sup> and Ref.10.( Horwitz et al)<sup>16</sup>.

**Table S2.** Fit values for the Arrhenius equation for both experimental methods and MD simulation.

| Electrolyte <sup>a</sup> | Method        | Fit   | R <sup>2</sup> |
|--------------------------|---------------|-------|----------------|
| Liquid-G2                | MD simulation | 0.771 | 0.606          |
| Liquid-G2                | Experimental  | 0.512 | 0.999          |
| Liquid-TMP               | MD simulation | 0.489 | 0.937          |
| Liquid-TMP               | Experimental  | 0.512 | 0.998          |

<sup>a</sup> 1M LiTFSI in the selected solvent.



**Table S3.** Compositions of GPE-based electrolytes in weight percentages.

| Sample   | Liquid electrolyte<br>(1 M LiTFSI in xy <sup>a</sup> ) | TA <sup>b</sup> | DA <sup>c</sup> | PEGA <sup>d</sup> |
|----------|--------------------------------------------------------|-----------------|-----------------|-------------------|
| GPE-xy50 | 50                                                     | 5               | 5               | 40                |
| GPE-xy70 | 70                                                     | 5               | 5               | 20                |
| GPE-xy80 | 80                                                     | 5               | 5               | 10                |
| GPE-xy90 | 90                                                     | 5               | 5               | 0                 |

<sup>a</sup>xy = selected ether based solvent.

<sup>b</sup>TA = glycerol propoxylate triacrylate

<sup>c</sup>DA = diethylene glycol diacrylate

<sup>d</sup>PEGA = poly(ethylene glycol) methyl ether acrylate

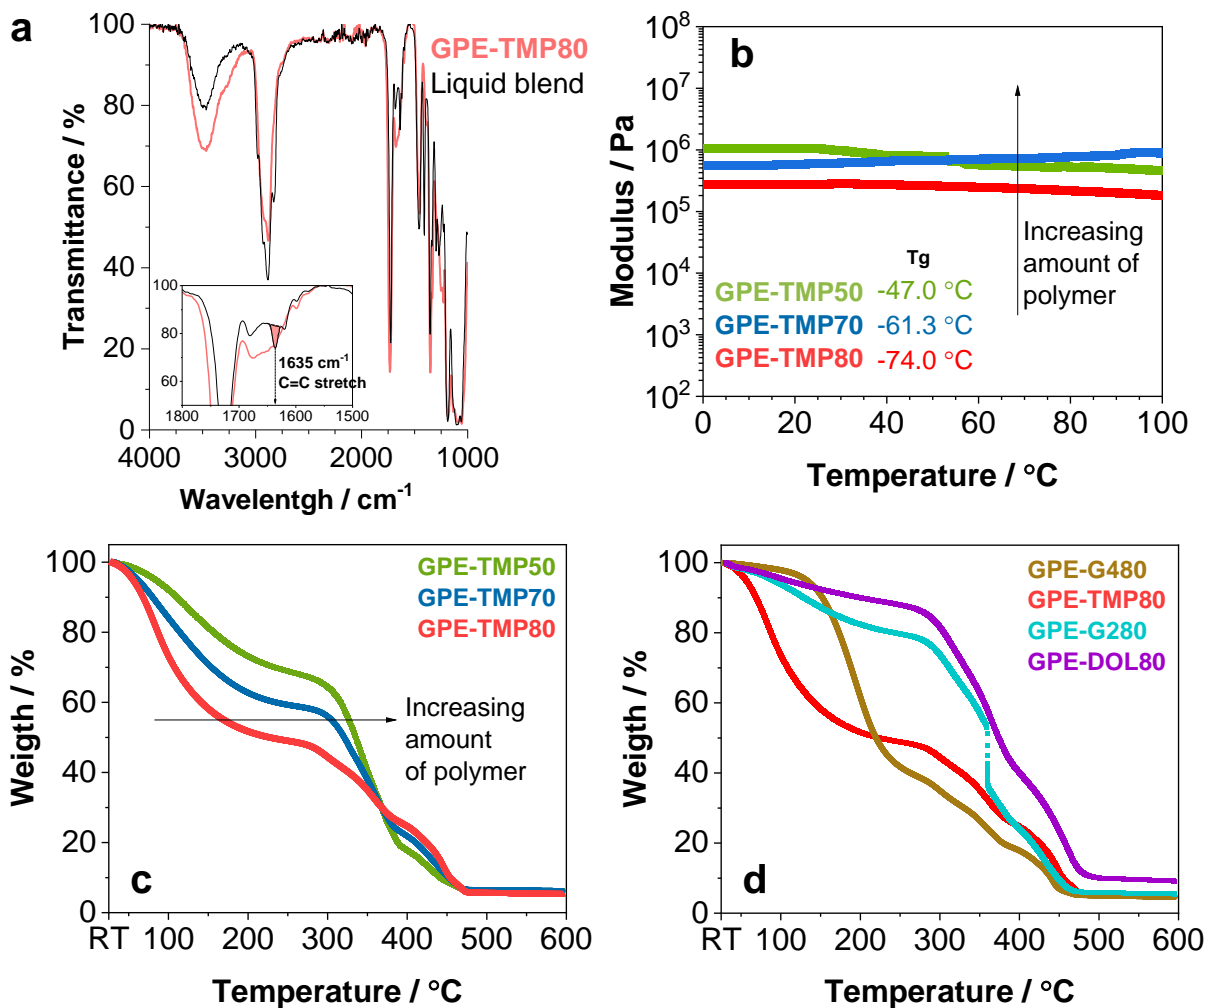

**Fig. S3.** a) FTIR spectra of GPE-TMP samples before (liquid blend) and after photopolymerisation. The 1635  $\text{cm}^{-1}$  band, which is associated to the carbon double bond of acrylate functionalities, disappeared from the solid GPEs spectra; b) DMTA analysis at compression from 0 to 100  $^{\circ}\text{C}$  of TMP-based GPEs; and TGA analysis under nitrogen atmosphere at 10  $^{\circ}\text{C}/\text{min}$  of c) GPE-TMP based samples and d) GPEs made with the four plasticizers analyzed in this work.

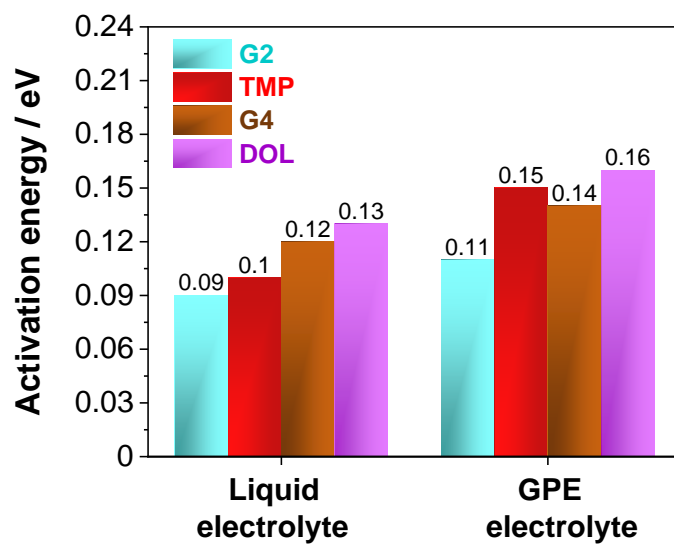

Fig. S4. Activation energies (eV) calculated following Arrhenius fittings of thermally-activated processes<sup>17</sup>.

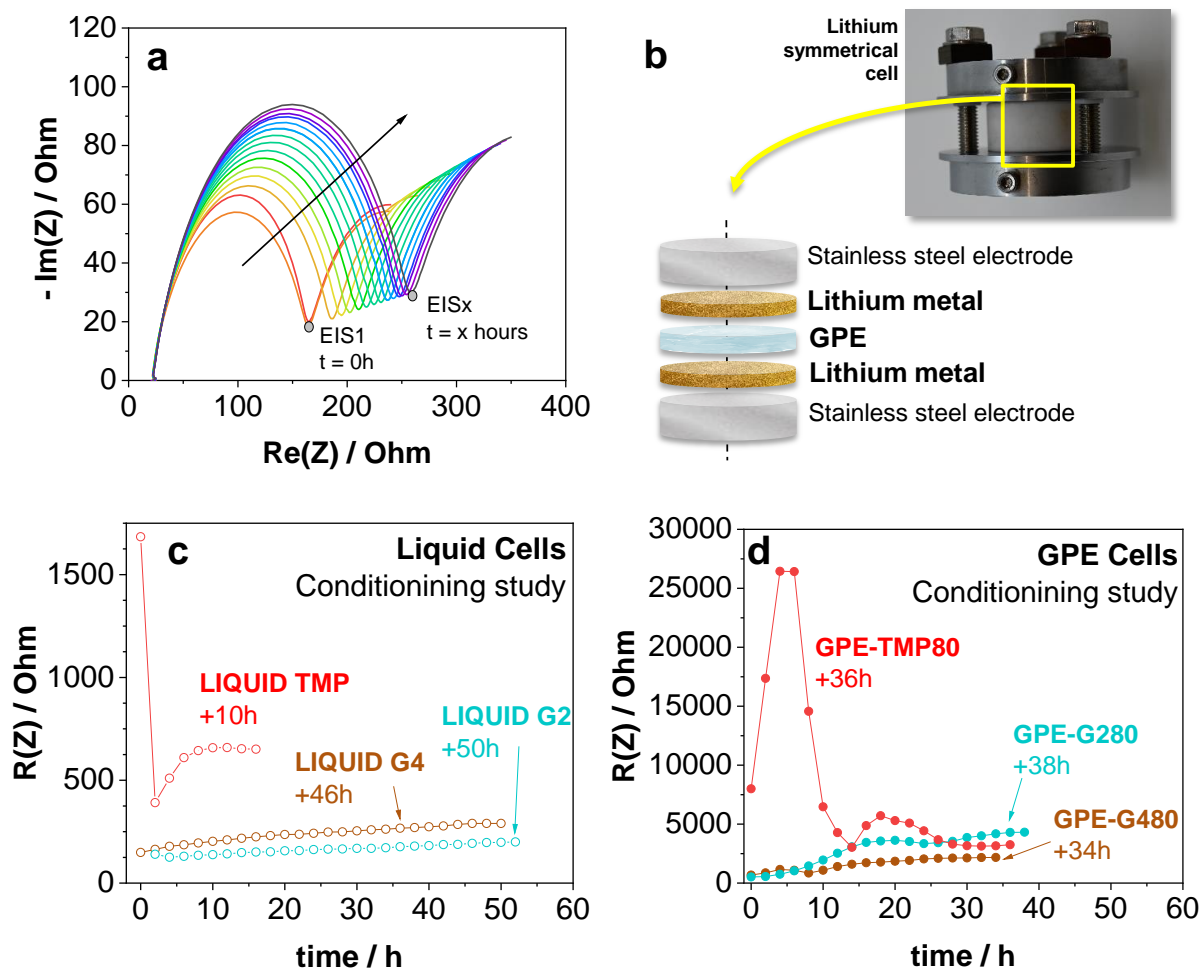

**Fig. S5.** a) Nyquist plots of lithium symmetrical cells using LIQ-G4 electrolyte showing the evolution of impedance at increasing timings; b) Scheme of lithium symmetric cell configuration used for conditioning time evaluation test; c) Evolution of impedance in time of cells using liquid electrolytes and d) Evolution of impedance in time of GPE-based cells. Please note that the scale used for the liquid and GPE cells are different.

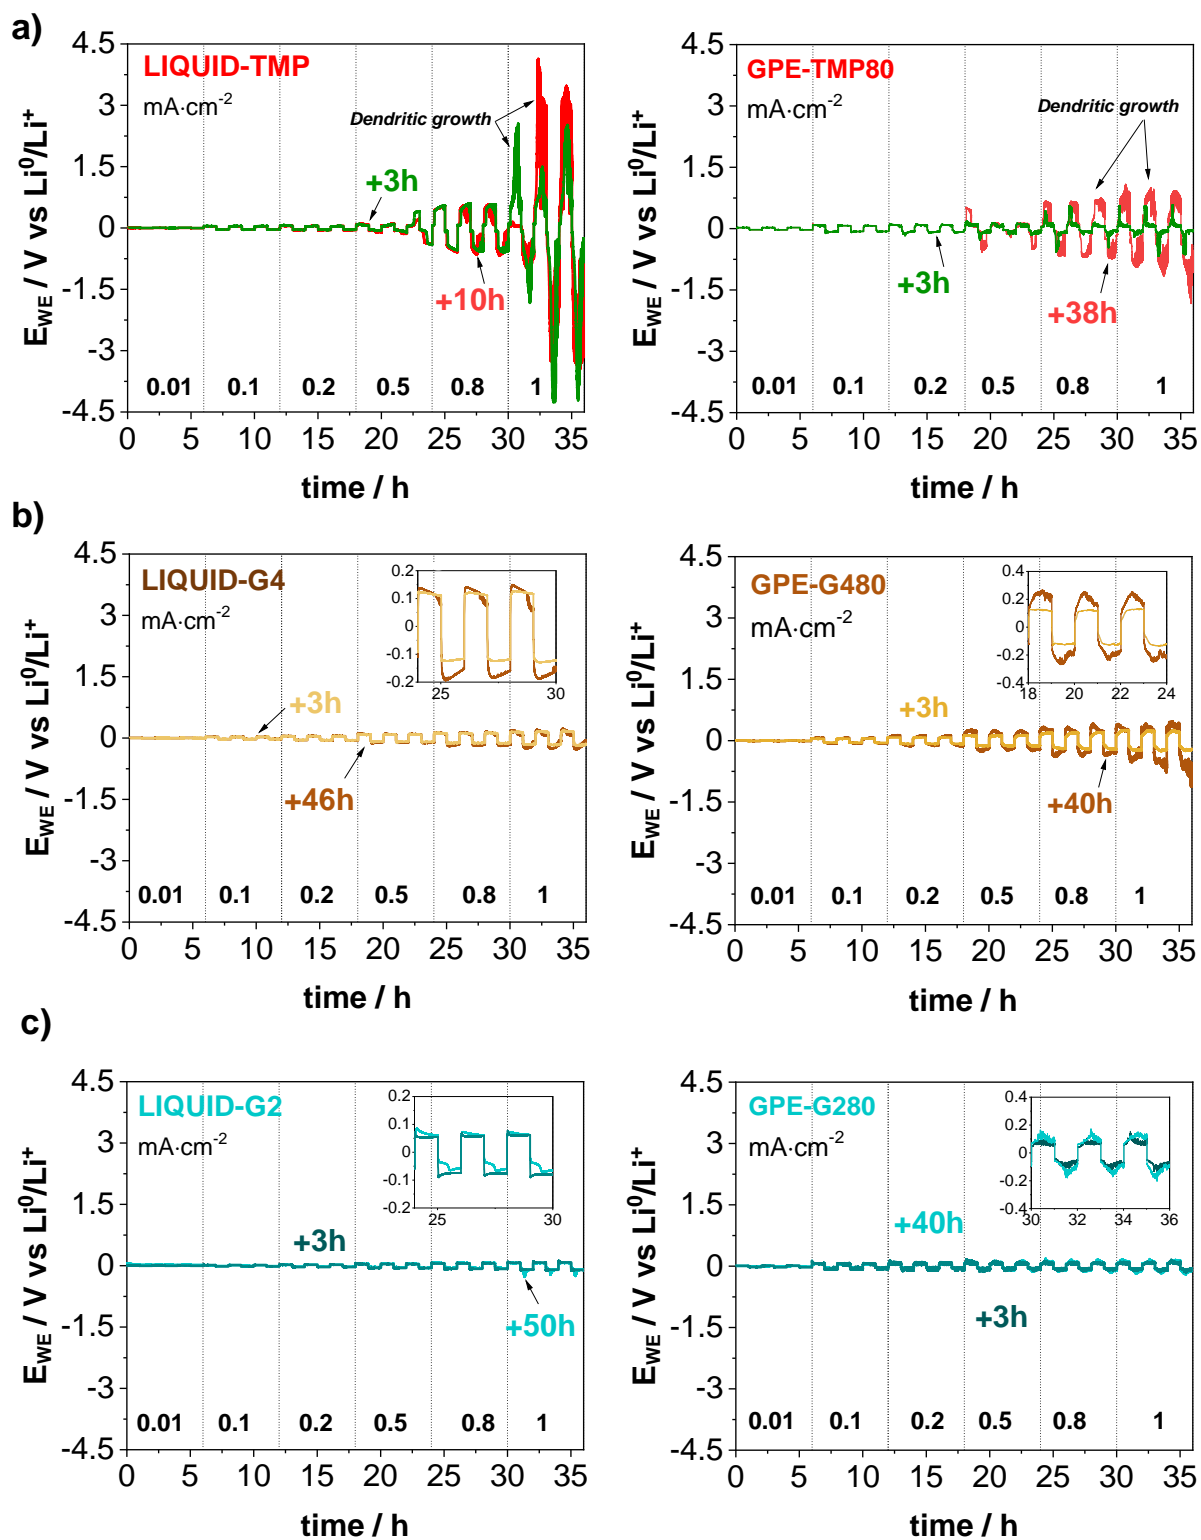

Fig. S6. Impact of conditioning time during lithium plating/stripping cycles on symmetrical cells from 0.01 to 1 mAcm<sup>-2</sup> using: a) LIQUID-TMT and GPE-TMP80 electrolytes; b) LIQUID-G4 and GPE-G480 electrolytes; and c) LIQUID-G2 and GPE-G280 electrolytes.

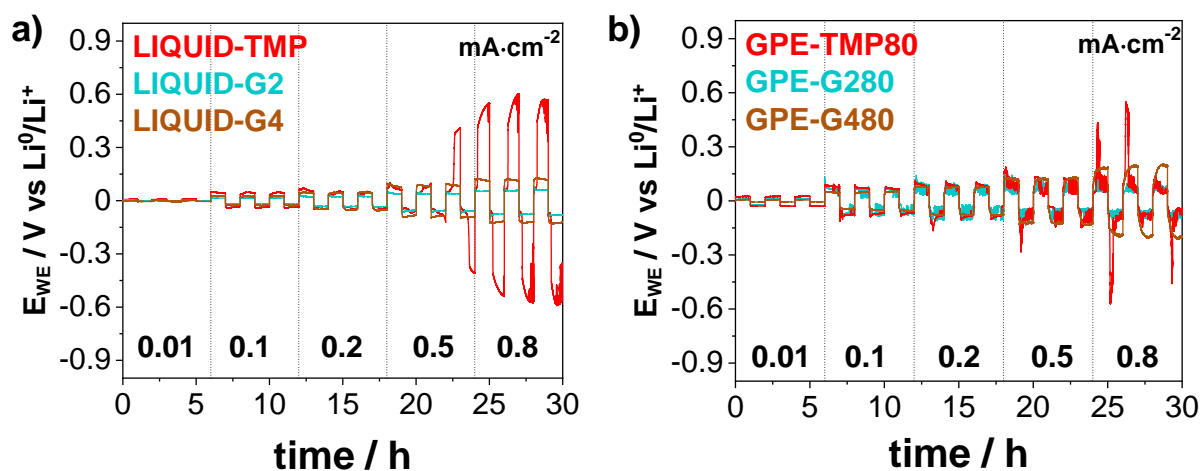

Fig. S7. Lithium stripping/plating curves at increasing current densities from 0.01 to 0.8 mA·cm<sup>-2</sup> of cells using a) liquid electrolytes and b) gel polymer electrolytes.

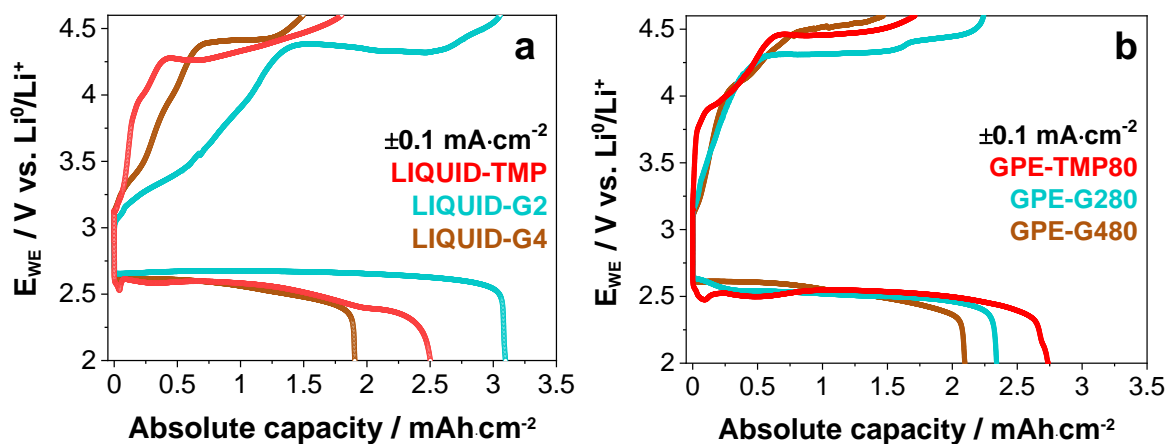

Fig. S8. Potential against absolute capacity during galvanostatic discharge/charge at ±0.1 mA·cm<sup>-2</sup> and 25 °C (limiting potential of 4.3 V for charge and 2 V for discharge). First cycles in Li-O<sub>2</sub> cells of: a) Liquid electrolytes based on TMP, G2 and G4; b) GPE electrolytes with TMP, G2 and G4 plasticizers.

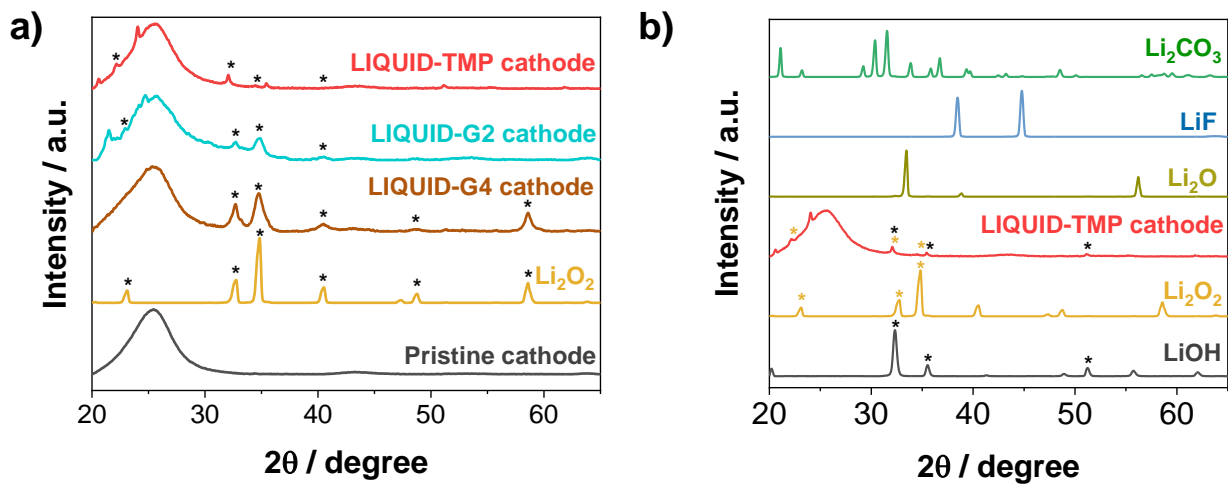

**Fig. S9.** X-ray diffraction (XRD) patterns of discharged cathodes of GPE Li-O<sub>2</sub> cells after first full discharge cycle: a) TMP, G2 and G4 samples compared with a pristine cathode and pure Li<sub>2</sub>O<sub>2</sub> powder; and b) GPE-TMP80 discharged cathode pattern compared with different lithium compounds.

## REFERENCES

- 1 B. S. Flowers, M. S. Mienthal, A. H. Jenkins, D. A. Wallace, J. W. Whitley, G. P. Dennis, M. Wang, C. H. Turner, V. N. Emel'Yanenko, S. P. Verevkin and J. E. Bara, *ACS Sustain. Chem. Eng.*, 2017, **5**, 911–921.
- 2 J. N. C. Lopes and A. A. H. Pádua, *J. Phys. Chem. B*, 2004, **108**, 16893–16898.
- 3 J. N. Canongia Lopes, J. Deschamps and A. A. H. Pádua, *J. Phys. Chem. B*, 2004, **108**, 11250.
- 4 J. N. Canongia Lopes and A. A. H. Pádua, *J. Phys. Chem. B*, 2006, **110**, 19586–19592.
- 5 J. N. Canongia Lopes, A. A. H. Pádua and K. Shimizu, *J. Phys. Chem. B*, 2008, **112**, 5039–5046.
- 6 L. Martínez, R. Andrade, E. G. Birgin and J. M. Martínez, *J. Comput. Chem.*, 2009, **30**, 2157–2164.
- 7 H. J. C. Berendsen, D. van der Spoel and R. van Drunen, *Comput. Phys. Commun.*, 1995, **91**, 43–56.
- 8 E. Lindahl, B. Hess and D. van der Spoel, *J. Mol. Model.*, 2001, **7**, 306–317.
- 9 D. Van Der Spoel, E. Lindahl, B. Hess, G. Groenhof, A. E. Mark and H. J. C. Berendsen, *J. Comput. Chem.*, 2005, **26**, 1701–1718.
- 10 B. Hess, C. Kutzner, D. Van Der Spoel and E. Lindahl, *J. Chem. Theory Comput.*, 2008, **4**, 435–447.
- 11 S. Pronk, S. Páll, R. Schulz, P. Larsson, P. Bjelkmar, R. Apostolov, M. R. Shirts, J. C. Smith, P. M. Kasson, D. Van Der Spoel, B. Hess and E. Lindahl, *Bioinformatics*, 2013, **29**, 845–854.
- 12 S. Páll, M. J. Abraham, C. Kutzner, B. Hess and E. Lindahl, *Lect. Notes Comput. Sci. (including Subser. Lect. Notes Artif. Intell. Lect. Notes Bioinformatics)*, 2015, **8759**, 3–27.
- 13 M. J. Abraham, T. Murtola, R. Schulz, S. Páll, J. C. Smith, B. Hess and E. Lindahl, *SoftwareX*, 2015, **1–2**, 19–25.
- 14 G. Bussi, D. Donadio and M. Parrinello, *J. Chem. Phys.*, , DOI:10.1063/1.2408420.
- 15 Landolt-Börnstein - Group IV Physical Chemistry, in *Static Dielectric Constants of Pure Liquids and Binary Liquid Mixtures*, ed. O. Madelung, Volume 6., 1991, pp. 5–69.
- 16 G. Horwitz, M. Factorovich, J. Rodriguez, D. Laria and H. R. Corti, *ACS Omega*, 2018, **3**, 11205–11215.
- 17 V. K. Singh, Shalu, L. Balo, H. Gupta, S. K. Singh and R. K. Singh, *J. Solid State Electrochem.*, 2017, **21**, 1713–1723.
